# Supplementary material
Source: Springer Nature journal article supplement (https://www.springermedizin.de/resource/supplementary/13030_2011_94_MOESM3_ESM.pdf/9644724)

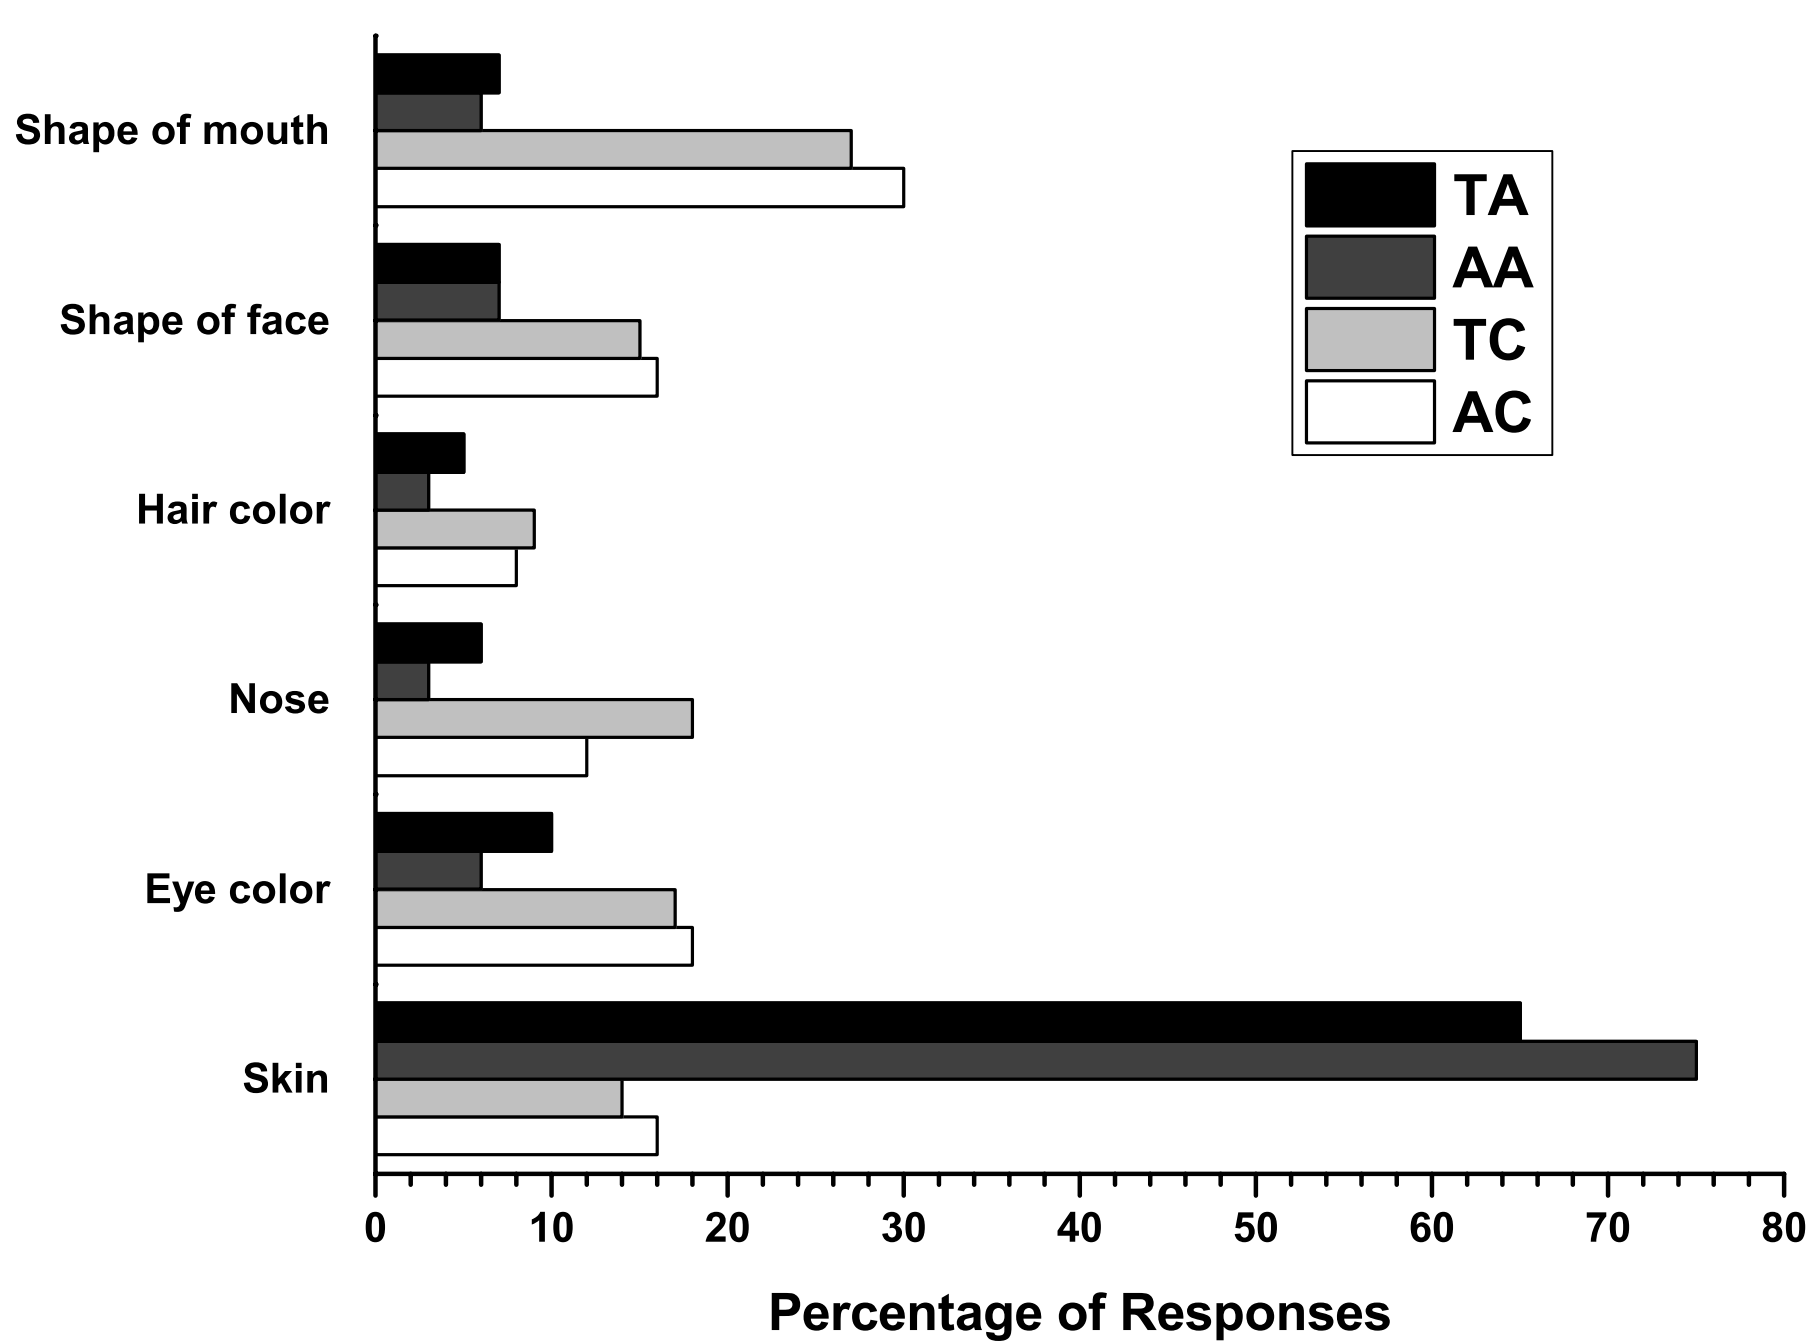

Supplement: MOESM3 [file 9644724]
